# Supplementary material for: Chemical synthesis, inhibitory activity and molecular mechanism of 1-deoxynojirimycin–chrysin as a potent α-glucosidase inhibitor
Source: Royal Society of Chemistry journal article supplement (doi:10.1039/d1ra07753h), 2021-01-01
Supplement: d1ra07753h1.pdf [file d1ra07753h1.pdf]

## Supplementary data

### **Chemical synthesis, inhibitory activity and molecular mechanism of 1-deoxynojirimycin–chrysin as a potent $\alpha$ -glucosidase inhibitor**

Ran Zhang<sup>a,b,1</sup>, Yueyue Zhang<sup>a,1</sup>, Gaiqun Huang<sup>a,c</sup>, Xiangdong Xin<sup>a</sup>, Liumei Tang<sup>a</sup>,  
Hao Li<sup>a,b</sup>, Kwang Sik Lee<sup>d</sup>, Byung Rae Jin<sup>d</sup>, Zhongzheng Gui<sup>a,b,\*</sup>

<sup>a</sup> School of Biotechnology, Jiangsu University of Science and Technology, Zhenjiang,  
Jiangsu 212100, People's Republic of China

<sup>b</sup> Sericultural Research Institute, Chinese Academy of Agricultural Sciences,  
Zhenjiang, Jiangsu 212100, People's Republic of China

<sup>c</sup> Sericultural Research Institute, Sichuan Academy of Agricultural Sciences,  
Nanchong, Sichuan 637000, People's Republic of China

<sup>d</sup> College of Natural Resources and Life Science, Dong-A University, Busan 49315,  
Republic of Korea.

| <b>Table of Contents</b>                                              | <b>Pages</b> |
|-----------------------------------------------------------------------|--------------|
| <b>Fig. S1.</b> $^1\text{H}$ -NMR spectrum of compound <b>1</b> .     | S3           |
| <b>Fig. S2.</b> $^{13}\text{C}$ -NMR spectrum of compound <b>1</b> .  | S3           |
| <b>Fig. S3.</b> $^1\text{H}$ -NMR spectrum of compound <b>2</b> .     | S4           |
| <b>Fig. S4.</b> $^{13}\text{C}$ -NMR spectrum of compound <b>2</b> .  | S4           |
| <b>Fig. S5.</b> $^1\text{H}$ -NMR spectrum compound <b>3</b> .        | S5           |
| <b>Fig. S6.</b> $^{13}\text{C}$ -NMR spectrum of compound <b>3</b> .  | S5           |
| <b>Fig. S7.</b> $^1\text{H}$ -NMR spectrum of compound <b>4</b> .     | S6           |
| <b>Fig. S8.</b> $^{13}\text{C}$ -NMR spectrum of compound <b>4</b> .  | S6           |
| <b>Fig. S9.</b> HRMS spectrum of compound <b>4</b> .                  | S7           |
| <b>Fig. S10.</b> HPLC characterization of compound <b>4</b> .         | S7           |
| <b>Fig. S11.</b> $^1\text{H}$ -NMR spectrum of compound <b>5</b> .    | S8           |
| <b>Fig. S12.</b> $^{13}\text{C}$ -NMR spectrum of compound <b>5</b> . | S8           |
| <b>Fig. S13.</b> HRMS spectrum of compound <b>5</b> .                 | S9           |
| <b>Fig. S14.</b> HPLC characterization of compound <b>5</b> .         | S9           |
| <b>Fig. S15.</b> $^1\text{H}$ -NMR spectrum of compound <b>6</b> .    | S10          |
| <b>Fig. S16.</b> $^{13}\text{C}$ -NMR spectrum of compound <b>6</b> . | S10          |
| <b>Fig. S17.</b> HRMS spectrum of compound <b>6</b> .                 | S11          |
| <b>Fig. S18.</b> HPLC characterization of compound <b>6</b> .         | S11          |

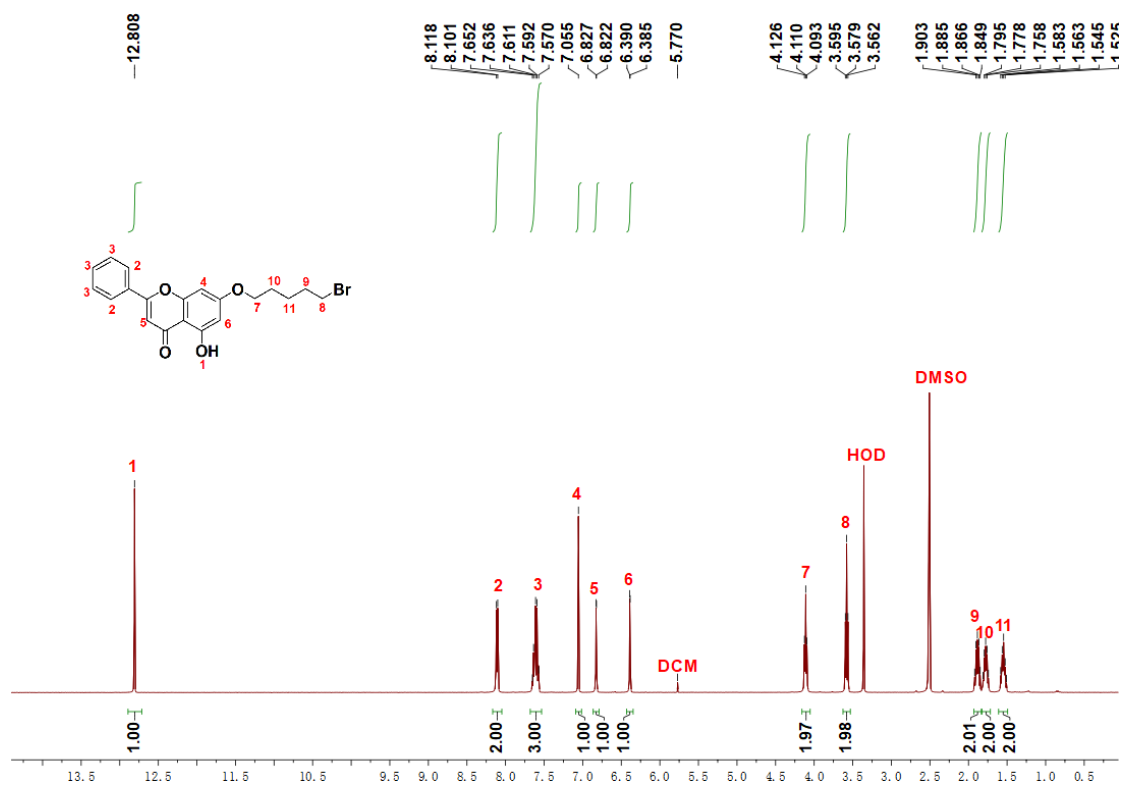

Fig. S1. <sup>1</sup>H-NMR spectrum (400 MHz) of compound 1 in DMSO-*d*<sub>6</sub>.

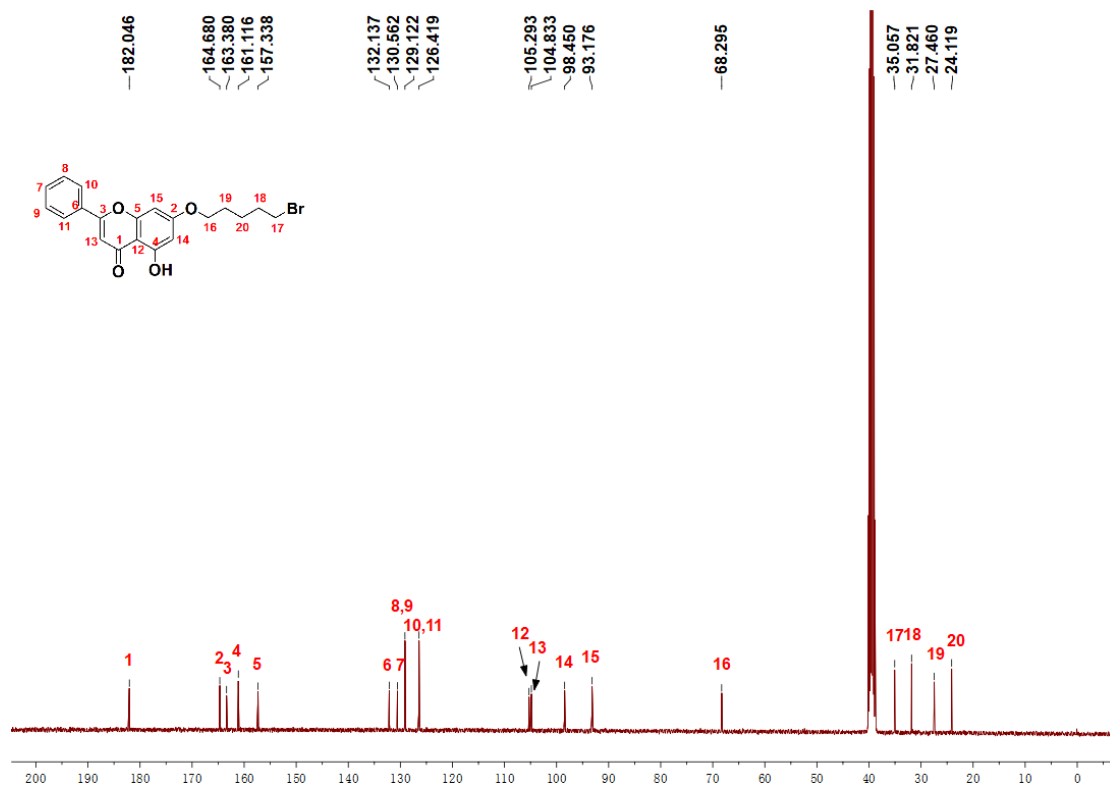

Fig. S2. <sup>13</sup>C-NMR spectrum (101 MHz) of compound 1 in DMSO-*d*<sub>6</sub>.

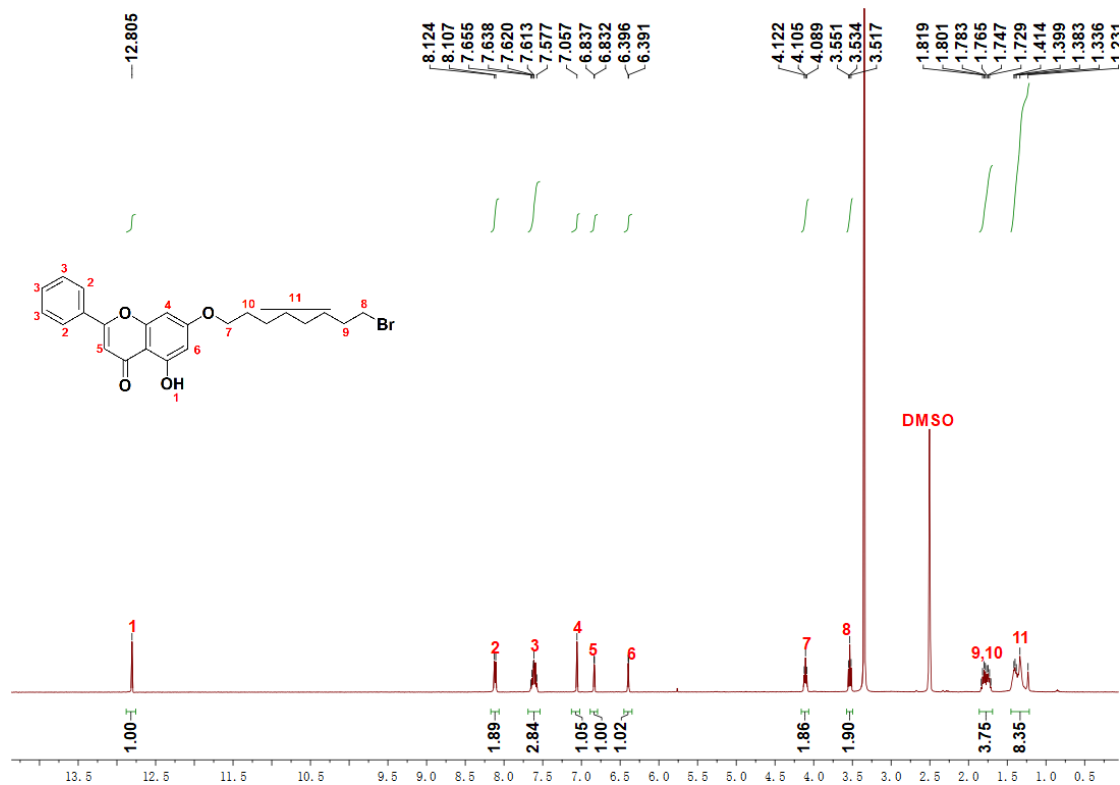

Fig. S3. <sup>1</sup>H-NMR spectrum (400 MHz) of compound 2 in DMSO-*d*<sub>6</sub>.

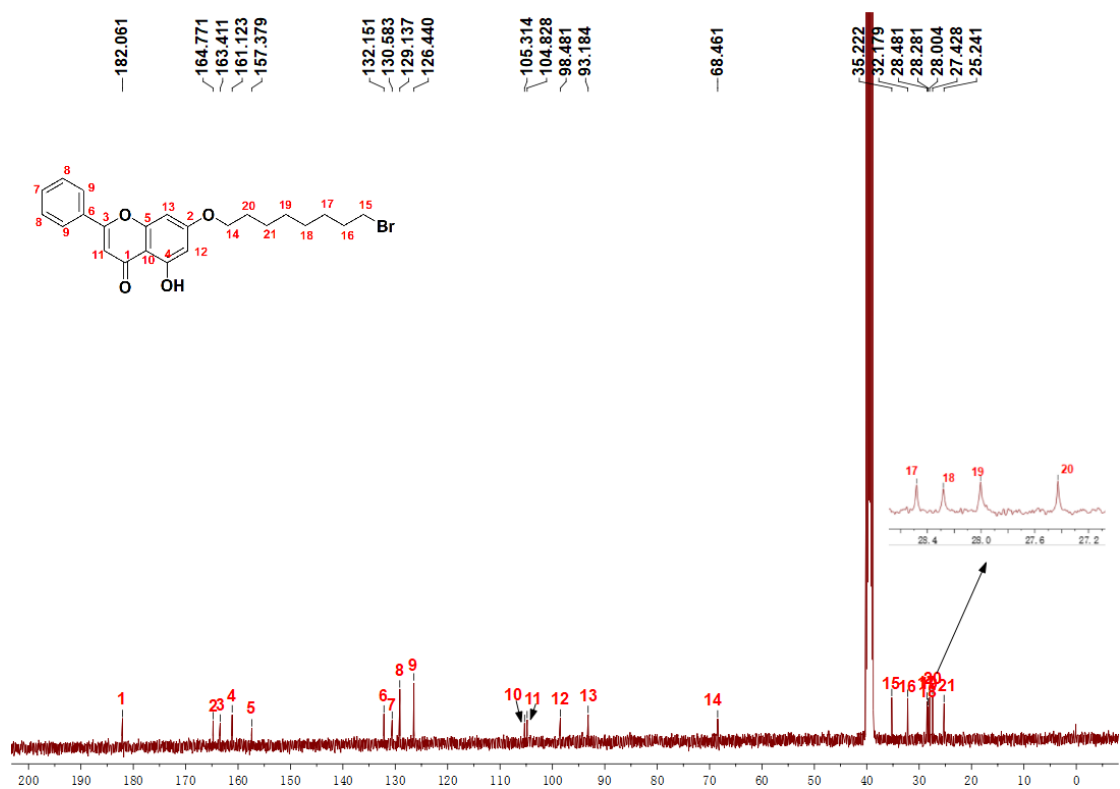

Fig. S4. <sup>13</sup>C-NMR spectrum (101 MHz) of compound 2 in DMSO-*d*<sub>6</sub>.

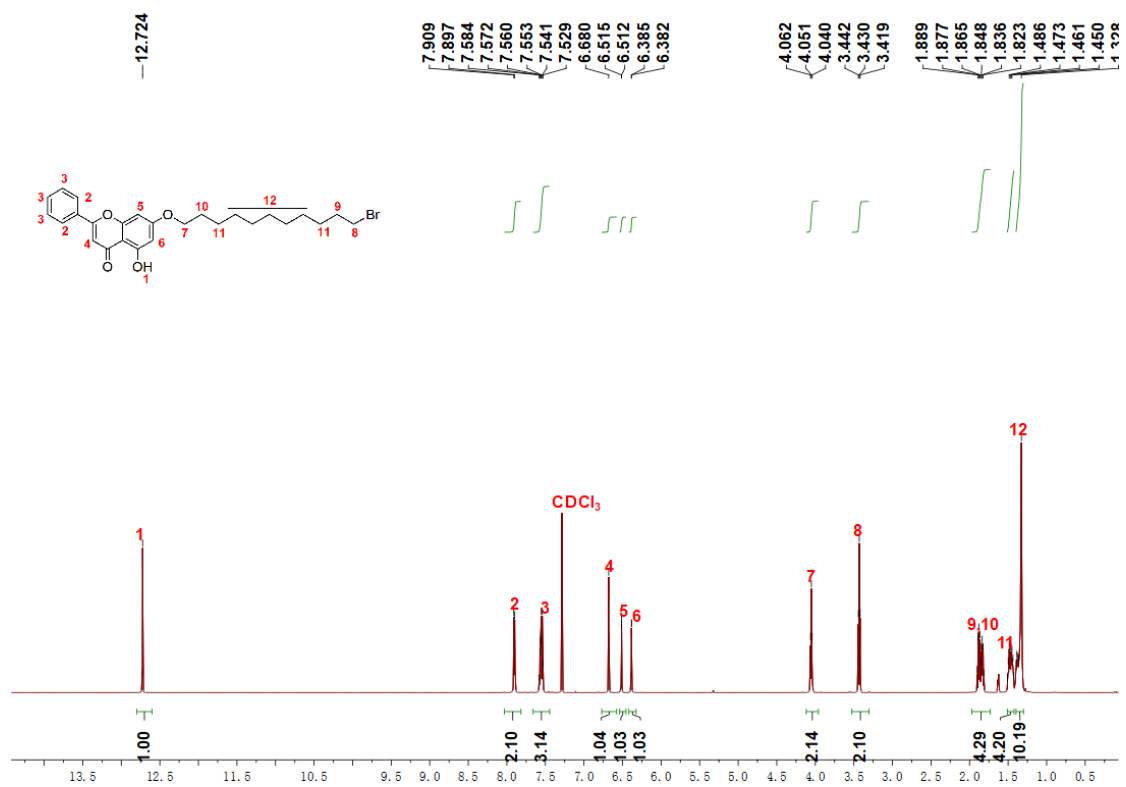

Fig. S5.  $^1\text{H-NMR}$  spectrum (600 MHz) of compound **3** in  $\text{CDCl}_3$ .

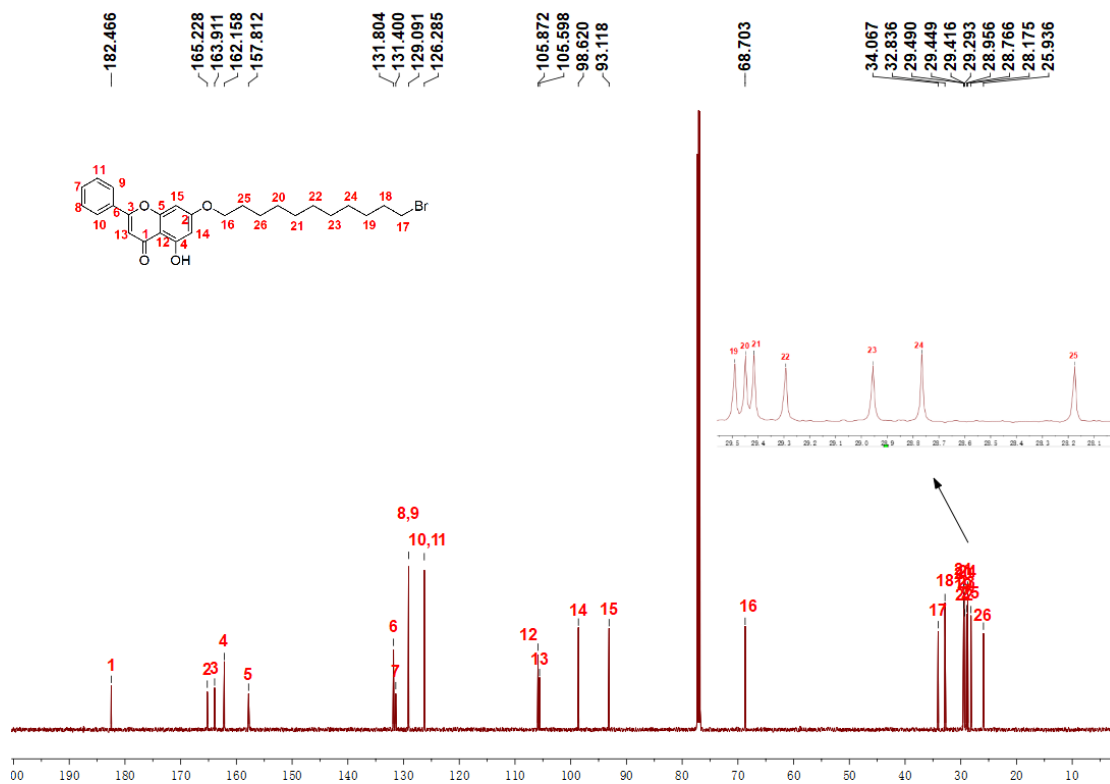

Fig. S6.  $^{13}\text{C-NMR}$  spectrum (150 MHz) of compound **3** in  $\text{CDCl}_3$ .

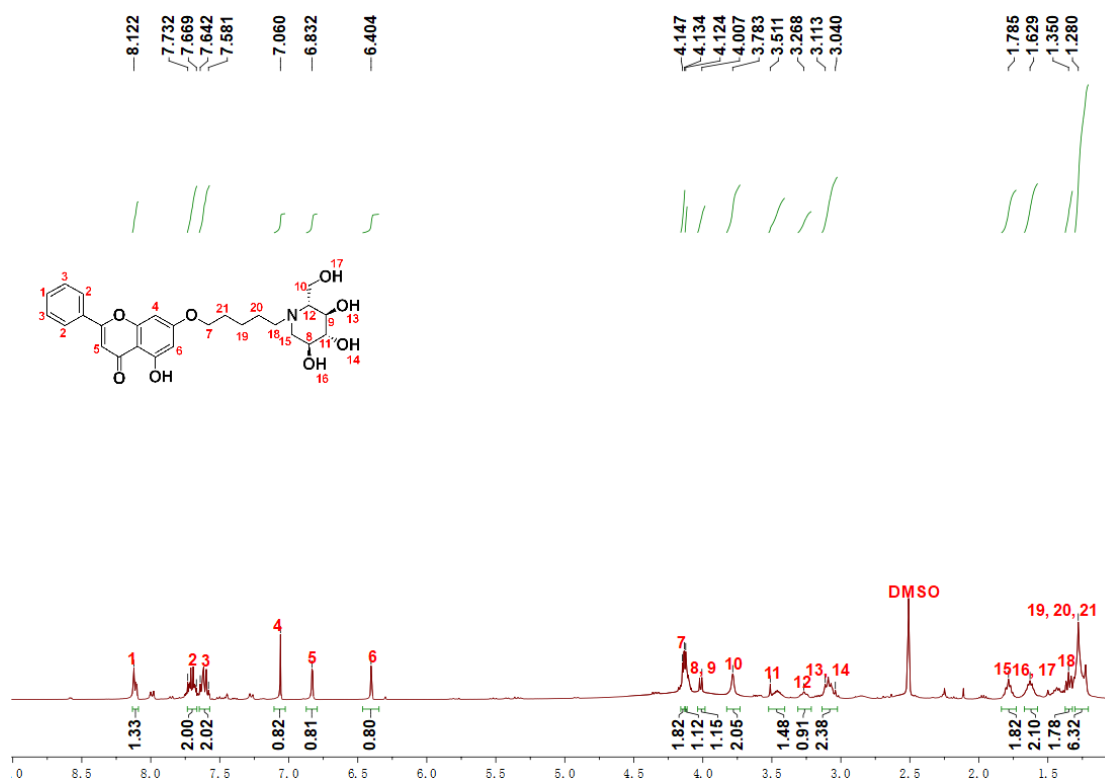

Fig. S7.  $^1\text{H-NMR}$  spectrum (400 MHz) of compound 4 in  $\text{DMSO-}d_6$ .

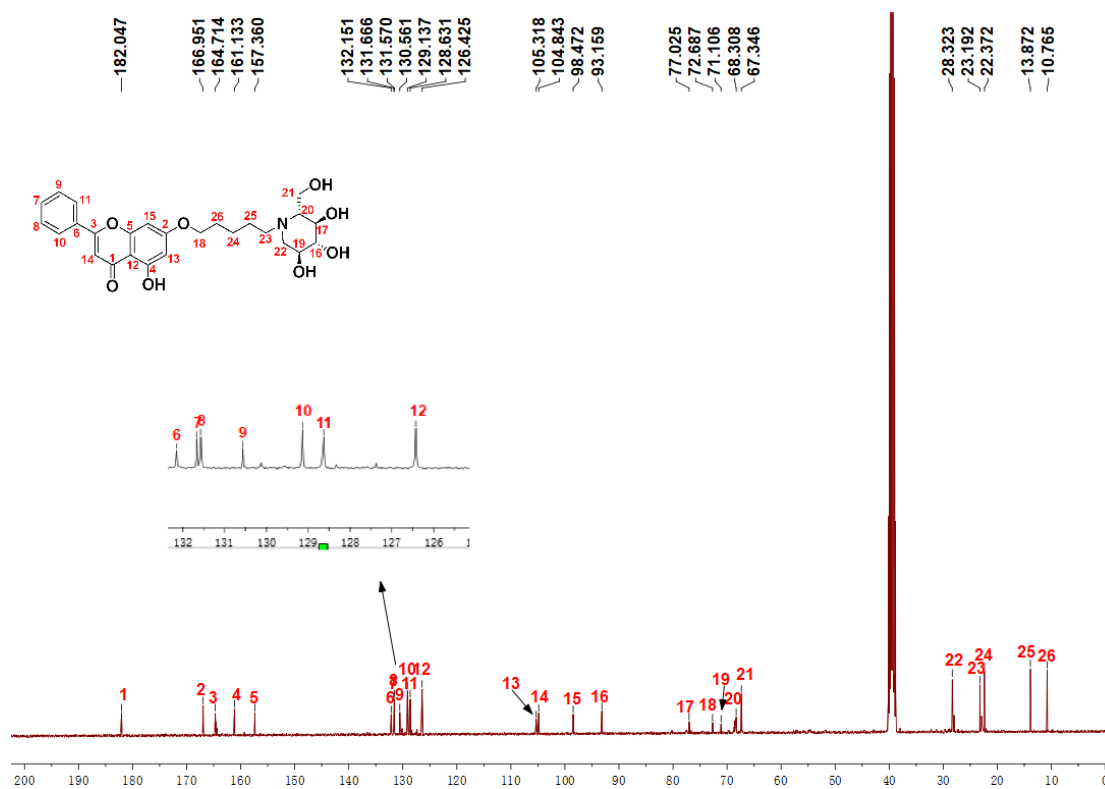

Fig. S8.  $^{13}\text{C-NMR}$  spectrum (101 MHz) of compound 4 in  $\text{DMSO-}d_6$ .

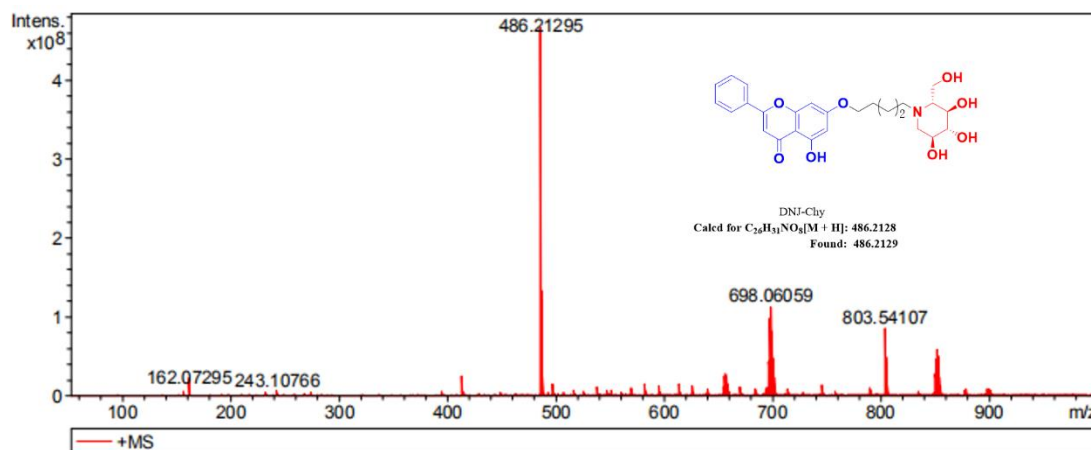

**Fig. S9.** HRMS spectrum of compound 4.

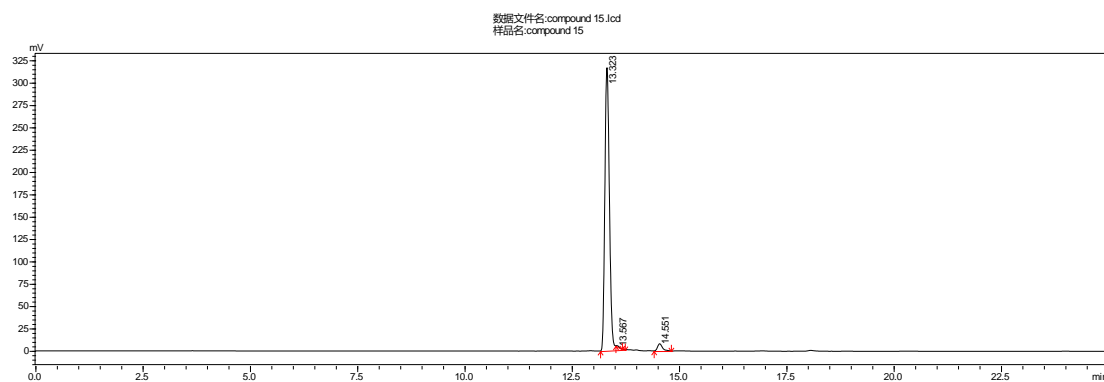

**Fig. S10.** HPLC characterization of compound 4.

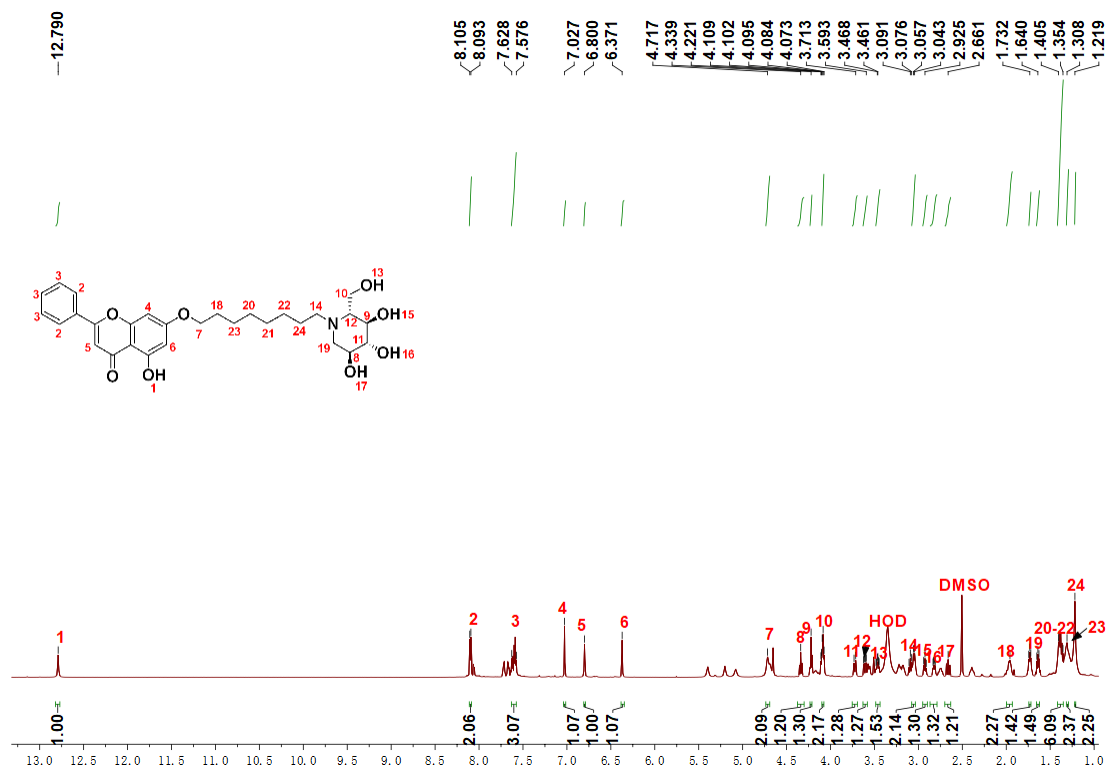

Fig. S11.  $^1\text{H-NMR}$  spectrum (600 MHz) of compound 5 in  $\text{DMSO-}d_6$ .

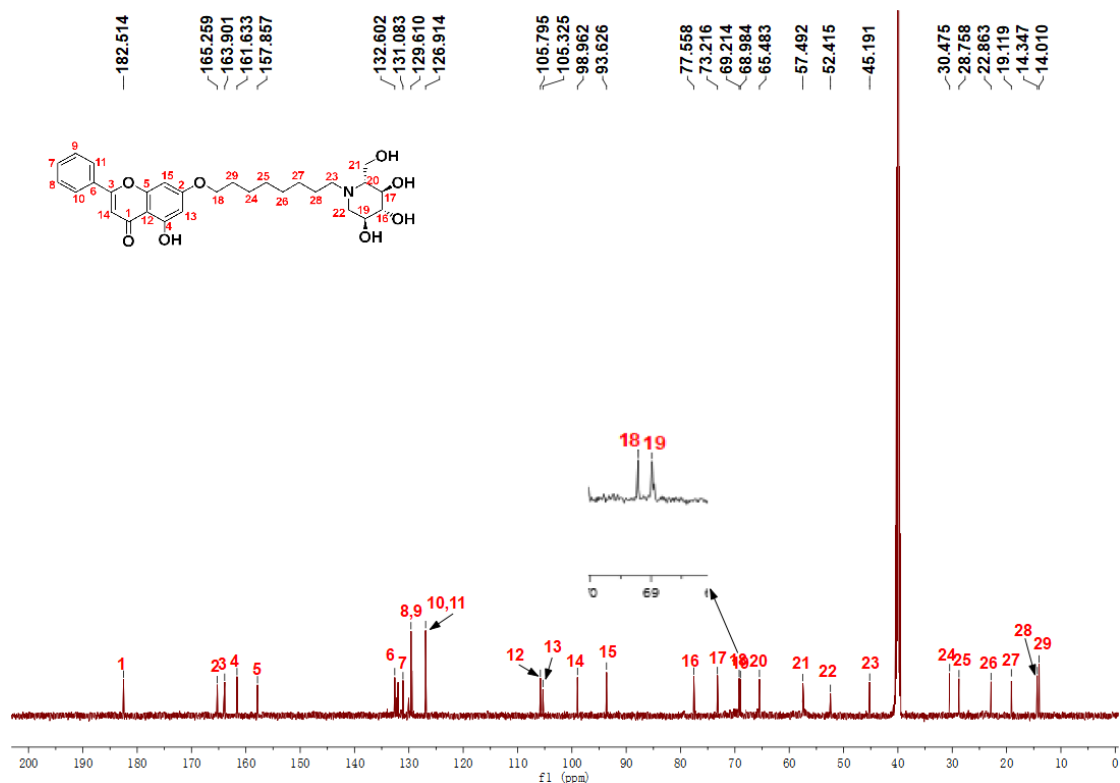

Fig. S12.  $^{13}\text{C-NMR}$  spectrum (150 MHz) of compound 5 in  $\text{DMSO-}d_6$ .



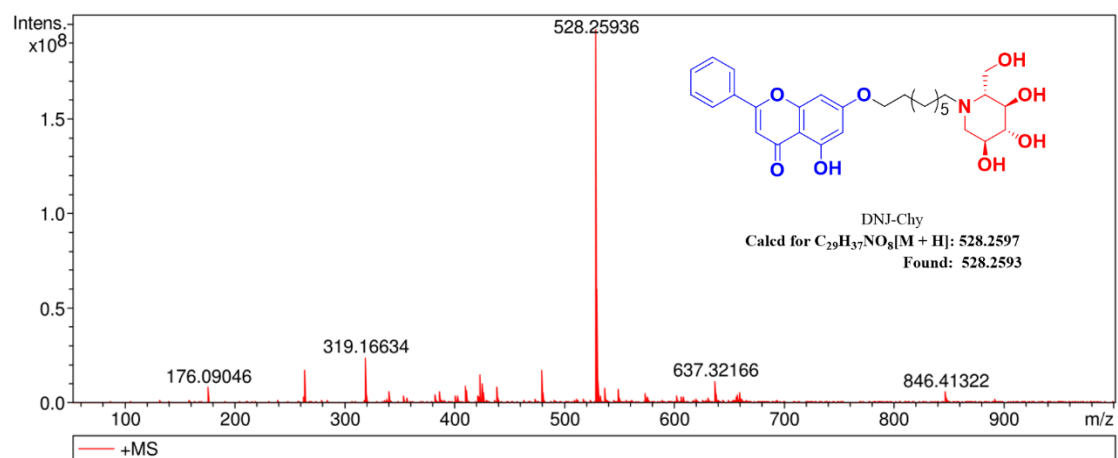

**Fig. S13.** HRMS spectrum of compound 5.

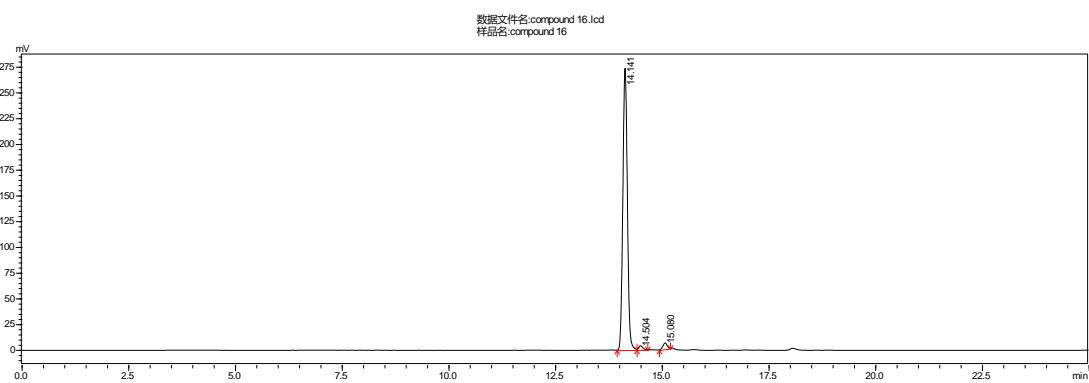

**Fig. S14.** HPLC characterization of compound 5.

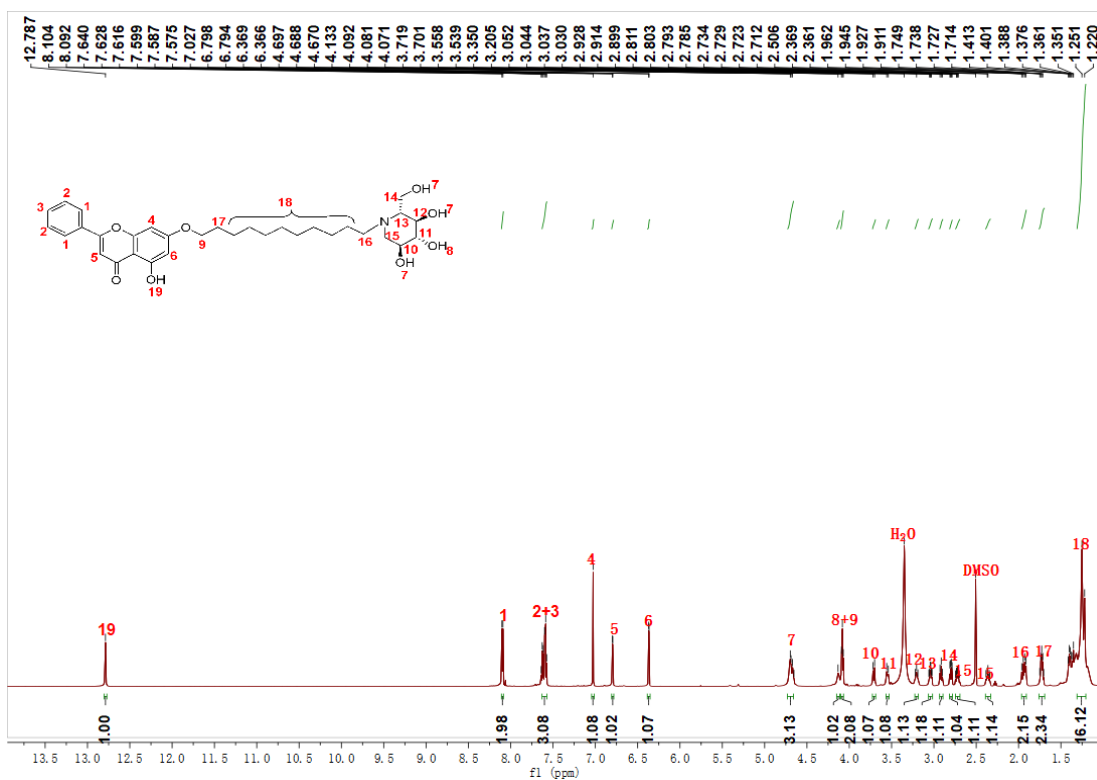

Fig. S11.  $^1\text{H}$ -NMR spectrum (600 MHz) of compound **6** in  $\text{DMSO-}d_6$ .

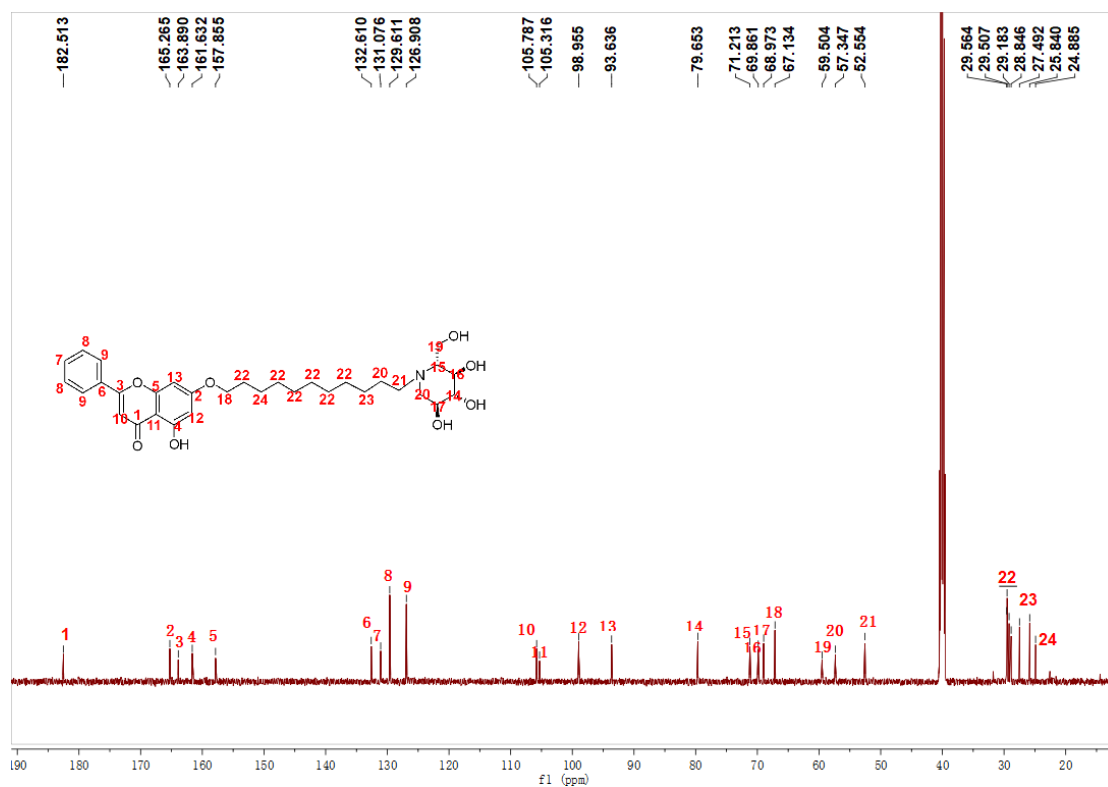

Fig. S12.  $^{13}\text{C}$ -NMR spectrum (150 MHz) of compound **6** in  $\text{DMSO-}d_6$ .

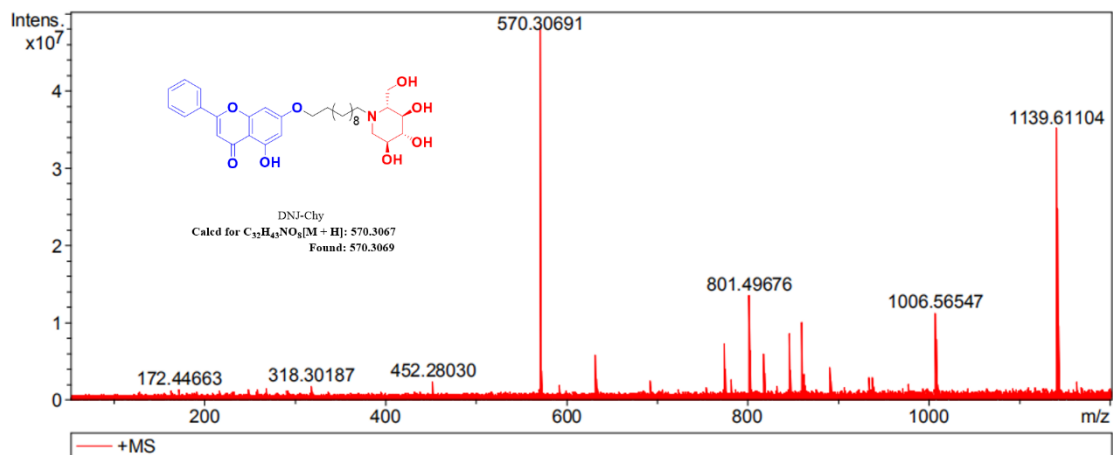

**Fig. S17.** HRMS spectrum of compound 6.

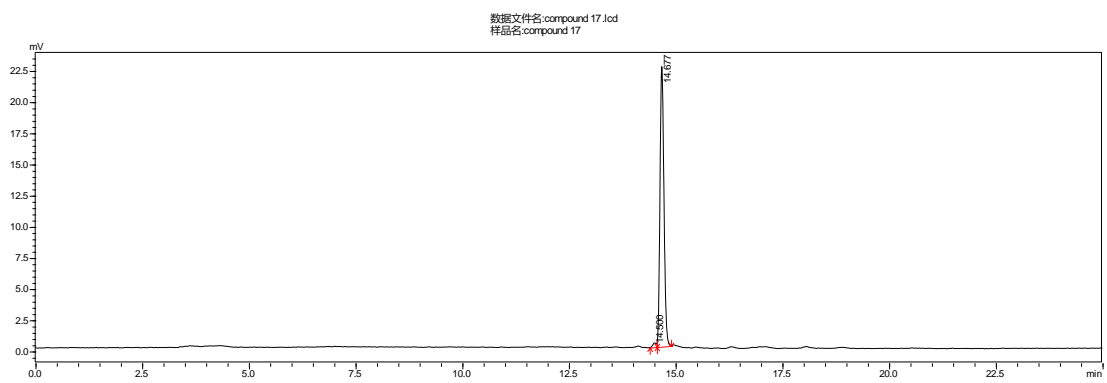

**Fig. S18.** HPLC characterization of compound 6.
